# Supplementary material for: Magnetotransport spectroscopy of electroburnt graphene nanojunctions
Source: Royal Society of Chemistry journal article supplement (doi:10.1039/d3nr06176k), 2024-01-01
Supplement: d3nr06176k1.pdf [file d3nr06176k1.pdf]

# Supporting Information

## Magnetotransport Spectroscopy of Electroburnt Graphene Nanojunctions

Zhengyang Jin<sup>#,1</sup>, Caigan Xi<sup>#1</sup>, Jun Chen<sup>\*,1</sup>, Yiping Ouyang<sup>1</sup>, Feng Wang<sup>1</sup>, Minhao  
Zhang<sup>\*,1,2</sup> and Fengqi Song<sup>1,2</sup>

<sup>1</sup> National Laboratory of Solid State Microstructures, Collaborative Innovation Center  
of Advanced Microstructures, and School of Physics, Nanjing University, Nanjing  
210093, China.

<sup>2</sup> Atom Manufacturing Institute (AMI), Nanjing 211805, China.

---

<sup>#</sup>These authors contributed equally to this work.

<sup>\*</sup>Corresponding author. Email: J.C.(dz1922001@smail.nju.edu.cn);

M.Z.([zhangminhao@nju.edu.cn](mailto:zhangminhao@nju.edu.cn))

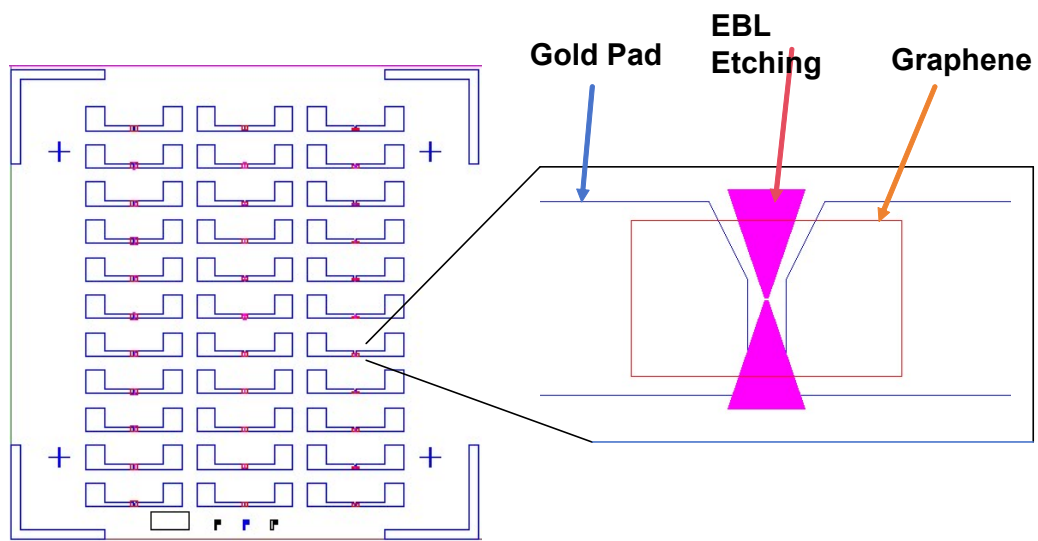

## S1. Device design

Figure S1. The CAD design drawing of the device, The enlarged section shows the preparation scheme of graphene bands.

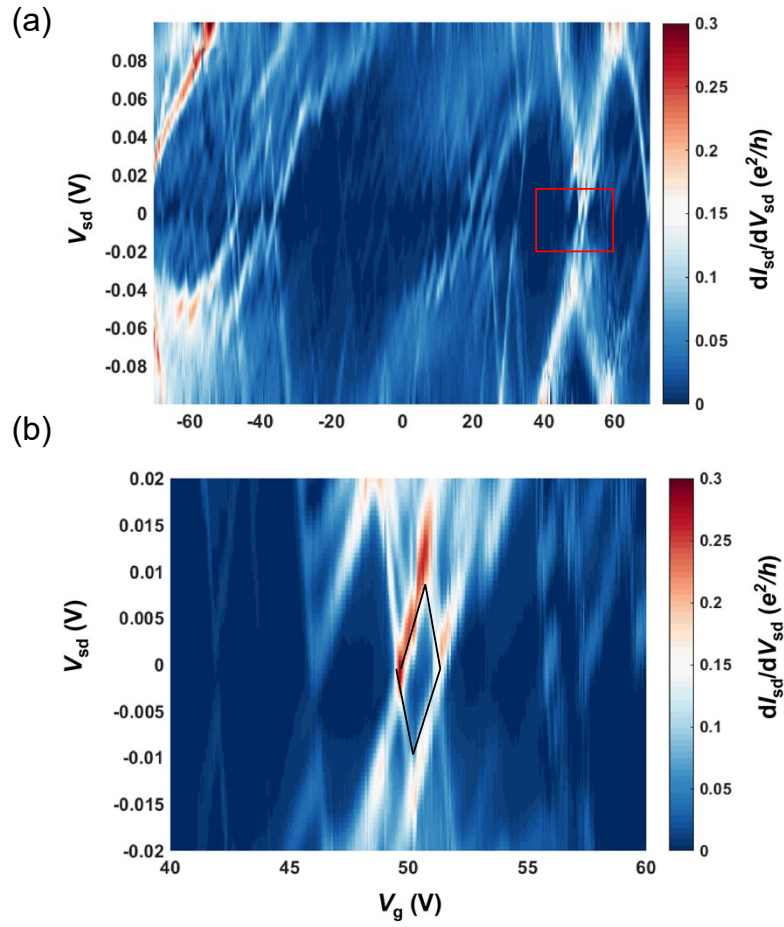

## S2. Graphene nanoribbons in a partially broken state

Figure S2. (a) Differential conductance map of the device in Figure 2d with  $V_g$  from -70 V to 70 V and  $V_{sd}$  from -0.1 V to 0.1V. (b) Differential conductance map with  $V_g$  from 40V to 60V and  $V_{sd}$  from -0.02 V to 0.02 V cut from (a). The Coulomb diamond with  $E_{add} = 8.5$  meV is marked by the solid line. The diameter of the ‘dot’ is at least 100 nm. so it illustrates the situation that graphene nanoribbons in a partially broken state. There are also some articles [*Nano Lett.* **16**, 4210-4216 (2016); *Physical Review B.* **90** 115405 (2014)] that observed the similar transport characteristics which the

author defined as graphene constrictions.

### S3. The change in conductance of the device C

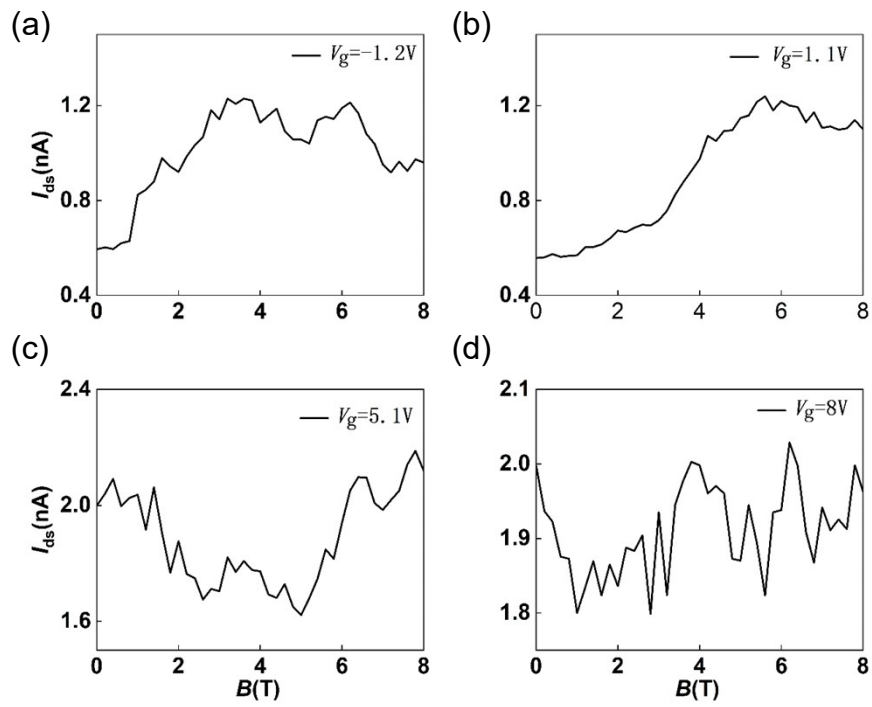

Figure S3. The raw data of conductance change of device C in a magnetic field showed in Figure 4(a), (b), (c) and (d).

#### S4. The change in conductance of the device A

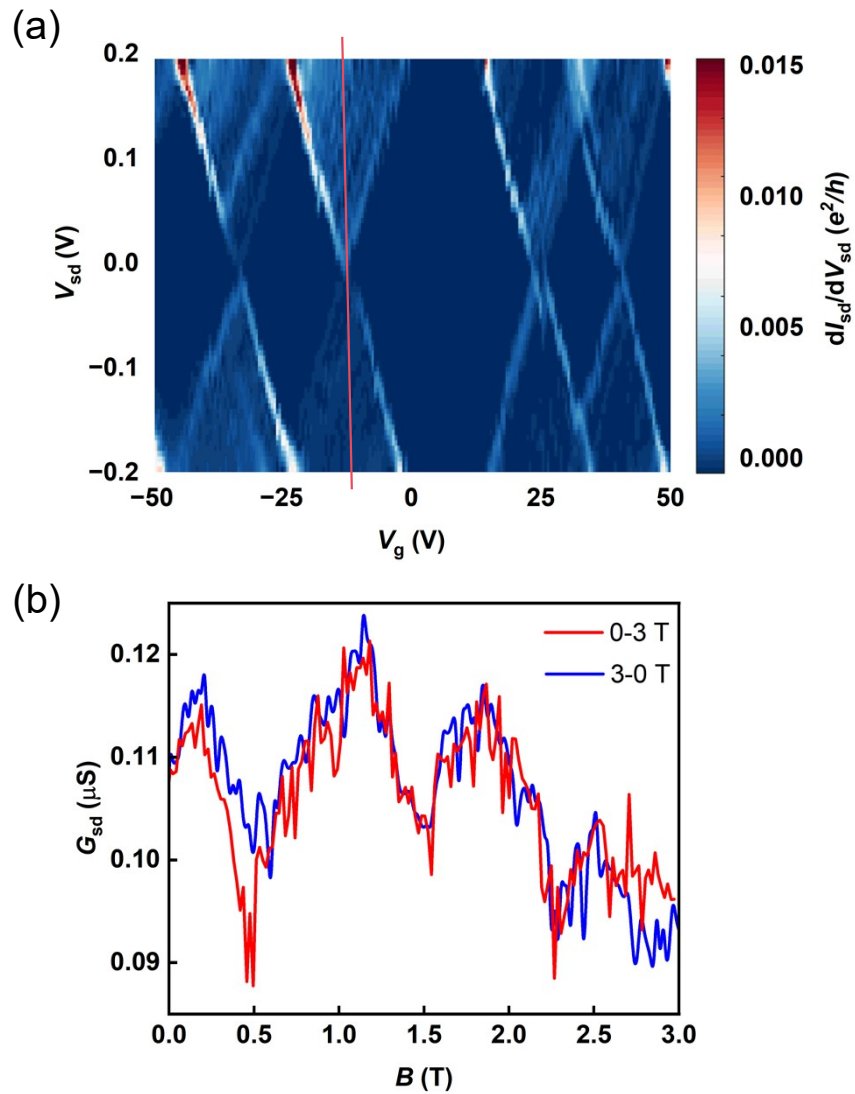

Figure S4. Conductance and applied vertical magnetic field relationship of device A. The bias voltage is 2 mV, the magnetic field changes from 0 to 3 T and then from 3 to 0 T, and the gate voltage is -10V, near the intersection point of diamond 1 and 2 in Figure 3a.
